# Supplementary material for: Ebola Cases and Health System Demand in Liberia
Source: PubMed Central journal article supplement (PMC4293091; doi:10.1371/journal.pbio.1002056), 2015-01-13

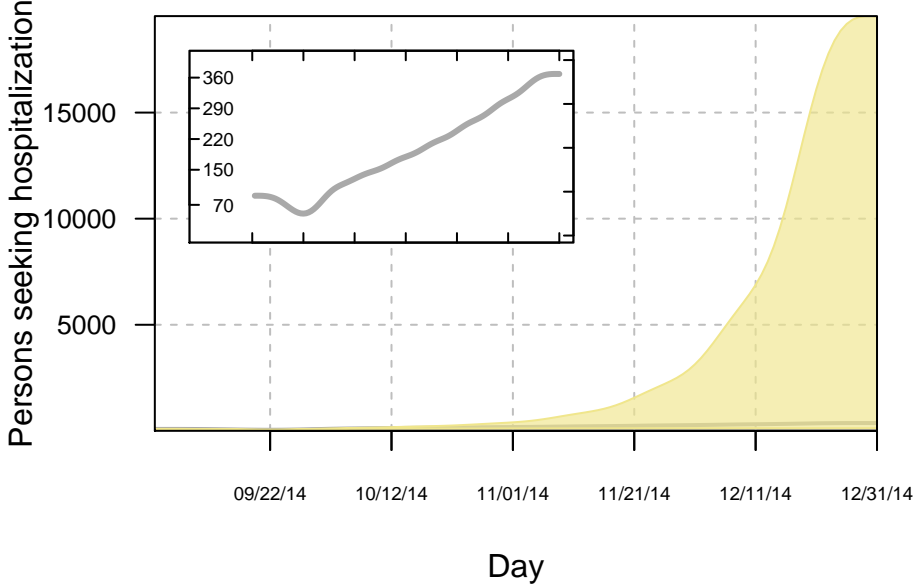

Supplement: pbio.1002056.s004.pdf [file pbio.1002056.s004.pdf]
