# Supplementary material for: Ebola Cases and Health System Demand in Liberia
Source: PubMed Central journal article supplement (PMC4293091; doi:10.1371/journal.pbio.1002056), 2015-01-13

New cases

1e+06  
1e+04  
1e+02  
1e+00

Sep 02

Sep 17

Oct 02

Oct 17

Nov 01

Nov 16

Dec 01

Dec 16

Dec 31

Date

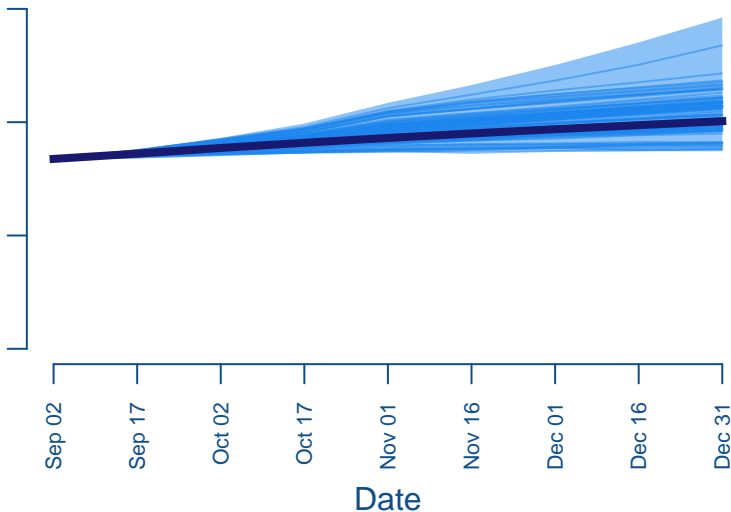

Supplement: pbio.1002056.s005.pdf [file pbio.1002056.s005.pdf]
