# Supplementary material for: Ebola Cases and Health System Demand in Liberia
Source: PubMed Central journal article supplement (PMC4293091; doi:10.1371/journal.pbio.1002056), 2015-01-13

New cases

1e+08  
1e+06  
1e+04  
1e+02  
1e+00

Sep 02 Sep 17 Oct 02 Oct 17 Nov 01 Nov 16 Dec 01 Dec 16 Dec 31 Jan 15 Jan 30 Feb 14 Mar 01 Mar 16

Date

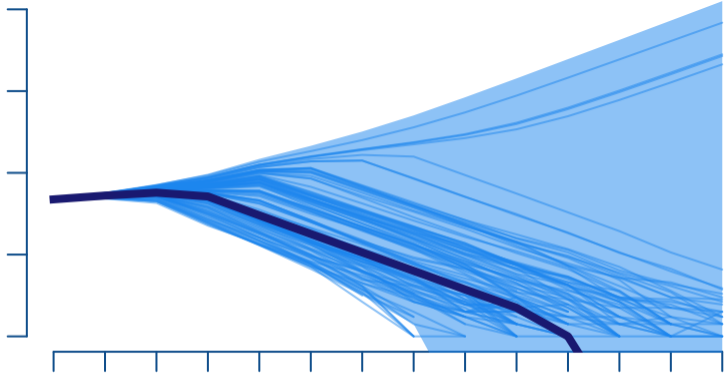

Supplement: pbio.1002056.s009.pdf [file pbio.1002056.s009.pdf]
