# Supplementary material for: Ebola Cases and Health System Demand in Liberia
Source: PubMed Central journal article supplement (PMC4293091; doi:10.1371/journal.pbio.1002056), 2015-01-13

# Projected epidemic size by end of 2014

Baseline

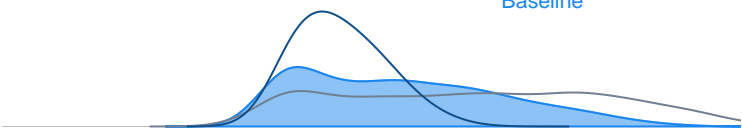

Scenario A

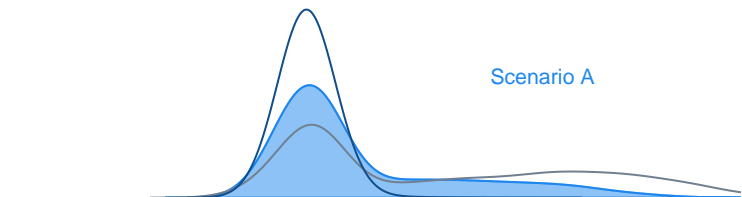

Scenario B

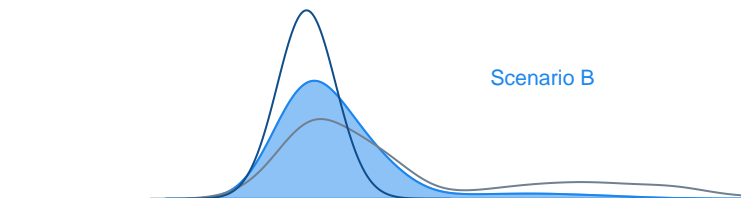

Scenario C

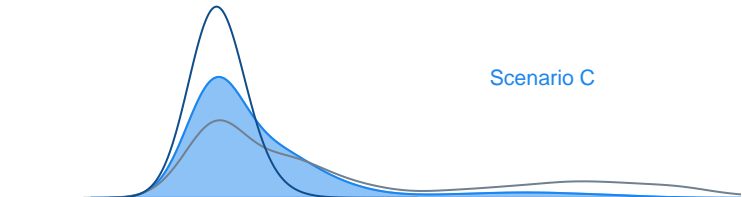

Scenario D

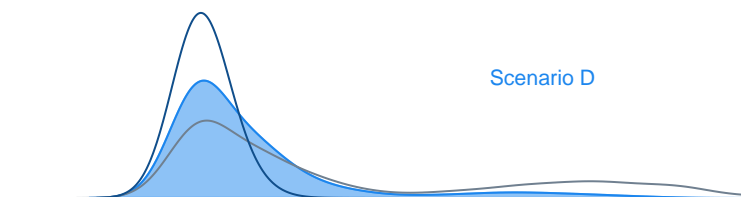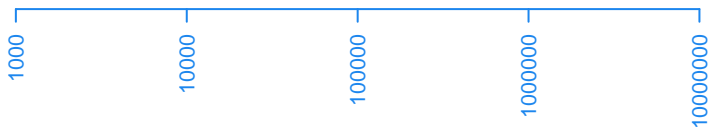

Supplement: pbio.1002056.s012.pdf [file pbio.1002056.s012.pdf]
